# Supplementary material for: 18F‑fluorodeoxyglucose positron emission tomography predicts recurrence and histological grade of extrahepatic bile duct cancer
Source: PubMed Central journal article supplement — Oncol Lett. 2023 Feb 9;25(3):125. doi: 10.3892/ol.2023.13711 (PMC9950358; doi:10.3892/ol.2023.13711), 2023-02-09
Supplement: Supplementary_Data.pdf [file Supplementary_Data.pdf]

Table SI. Histopathological factors in the recurrence and non-recurrence groups within the SUVmax-high group

| Characteristics          | SUVmax-high recurrence group, n | SUVmax-high non-recurrence group, n | P-value |
|--------------------------|---------------------------------|-------------------------------------|---------|
| Localization             |                                 |                                     |         |
| Hilar                    | 10                              | 5                                   | 0.52    |
| Distal                   | 14                              | 13                                  |         |
| Histology                |                                 |                                     |         |
| Papillary/well           | 14                              | 8                                   | 0.53    |
| Moderately/poorly/others | 10                              | 10                                  |         |
| Lymphatic invasion       |                                 |                                     |         |
| Absent                   | 9                               | 8                                   | 0.76    |
| Present                  | 15                              | 10                                  |         |
| Vessel invasion          |                                 |                                     |         |
| Absent                   | 10                              | 11                                  | 0.35    |
| Present                  | 14                              | 7                                   |         |
| Perineural invasion      |                                 |                                     |         |
| Absent                   | 6                               | 8                                   | 0.21    |
| Present                  | 18                              | 10                                  |         |
| T status                 |                                 |                                     |         |
| T1/T2                    | 17                              | 12                                  | >0.99   |
| T3/T4                    | 7                               | 6                                   |         |
| N status                 |                                 |                                     |         |
| N0                       | 10                              | 12                                  | 0.13    |
| N1/N2                    | 14                              | 6                                   |         |
| Stage                    |                                 |                                     |         |
| I/II                     | 15                              | 16                                  | 0.08    |
| III/IV                   | 9                               | 2                                   |         |
| Portal vein invasion     |                                 |                                     |         |
| Non-invasion             | 23                              | 16                                  | 0.57    |
| Invasion                 | 1                               | 2                                   |         |
| Resection margin         |                                 |                                     |         |
| Negative                 | 20                              | 17                                  | 0.37    |
| Positive                 | 4                               | 1                                   |         |

SUVmax, maximum standardized uptake value.

Table SII. Histopathological factors in the recurrence and non-recurrence groups within the SUVmax-low group.

| Characteristics          | SUVmax-low recurrence group, n | SUVmax-low non-recurrence group, n | P-value |
|--------------------------|--------------------------------|------------------------------------|---------|
| Localization             |                                |                                    |         |
| Hilar                    | 8                              | 6                                  | 0.11    |
| Distal                   | 8                              | 22                                 |         |
| Histology                |                                |                                    |         |
| Papillary/well           | 5                              | 14                                 | 0.34    |
| Moderately/poorly/others | 11                             | 14                                 |         |
| Lymphatic invasion       |                                |                                    |         |
| Absent                   | 8                              | 14                                 | >0.99   |
| Present                  | 8                              | 14                                 |         |
| Vessel invasion          |                                |                                    |         |
| Absent                   | 8                              | 16                                 | 0.76    |
| Present                  | 8                              | 12                                 |         |
| Perineural invasion      |                                |                                    |         |
| Absent                   | 5                              | 10                                 | >0.99   |
| Present                  | 11                             | 18                                 |         |
| T status                 |                                |                                    |         |
| T1/T2                    | 12                             | 20                                 | >0.99   |
| T3/T4                    | 4                              | 8                                  |         |
| N status                 |                                |                                    |         |
| N0                       | 10                             | 22                                 | 0.42    |
| N1/N2                    | 6                              | 6                                  |         |
| Stage                    |                                |                                    |         |
| I/II                     | 12                             | 22                                 | >0.99   |
| III/IV                   | 4                              | 6                                  |         |
| Portal vein invasion     |                                |                                    |         |
| Non-invasion             | 16                             | 26                                 | 0.53    |
| Invasion                 | 0                              | 2                                  |         |
| Resection margin         |                                |                                    |         |
| Negative                 | 16                             | 26                                 | 0.53    |
| Positive                 | 0                              | 2                                  |         |

SUVmax, maximum standardized uptake value.
